# Supplementary material for: MXene-supported Ni-Co bimetallic MOF 2D lamellar membrane for enhanced electrochemical oxygen reactions and Li-O 2 battery
Source: Research Square preprint supplement (doi:10.21203/rs.3.rs-6017278/v1), 2025-02-17
Supplement: Supplementary file 1 [file fb0ac6b2150881a50812779e.docx]

***Supplementary material***

**MXene-supported Ni-Co bimetallic MOF** **2D lamellar membrane for enhanced electrochemical oxygen reactions and Li-O2 battery**

Liming Liu1, Hongxia Lian1, Heming Deng2, Weixin Zhang2,*

1 School of Metallurgy, Northeastern University, Shenyang, 110167, China

2 School of Material Science and Engineering, Huazhong University of Science and Technology, Wuhan, 430074, China

*Corresponding authors: weixinzhang@hust.edu.cn (W.-X Zhang)


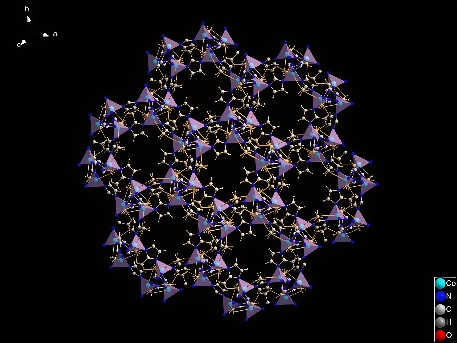


**Fig. S1.** Molecular structure of Ni/Co-MOF

**Fig. S2.** Molecular structure of Ti2C3


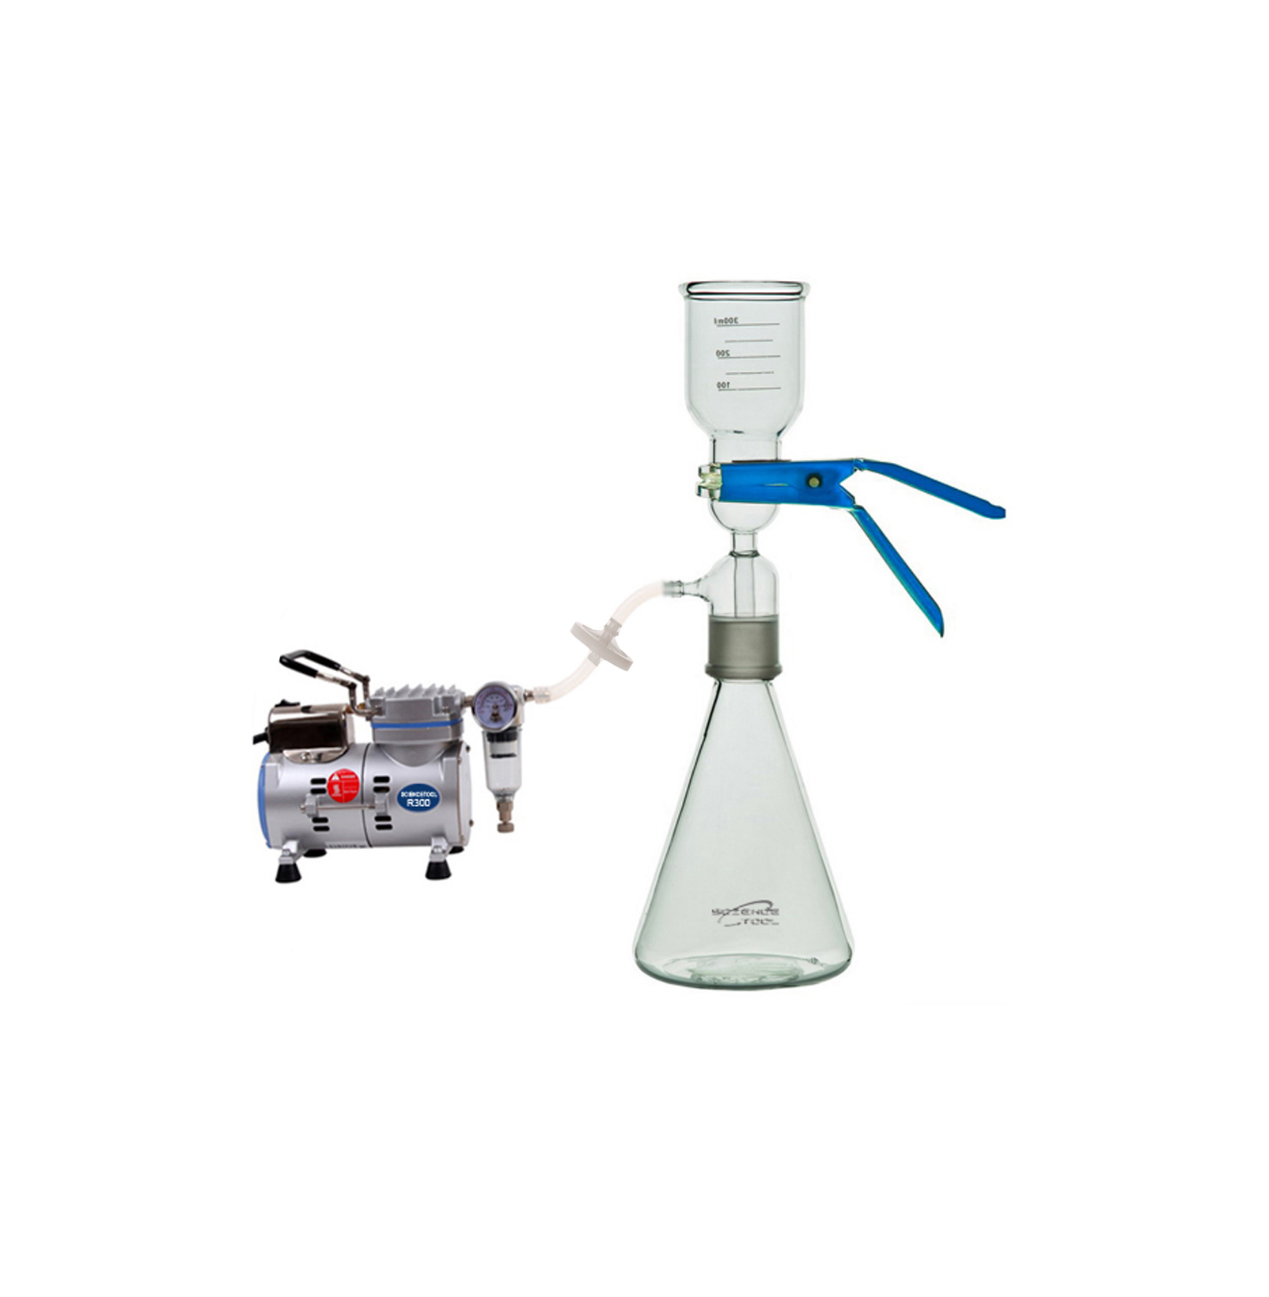


**Fig. S3.** vacuum filtration equipment


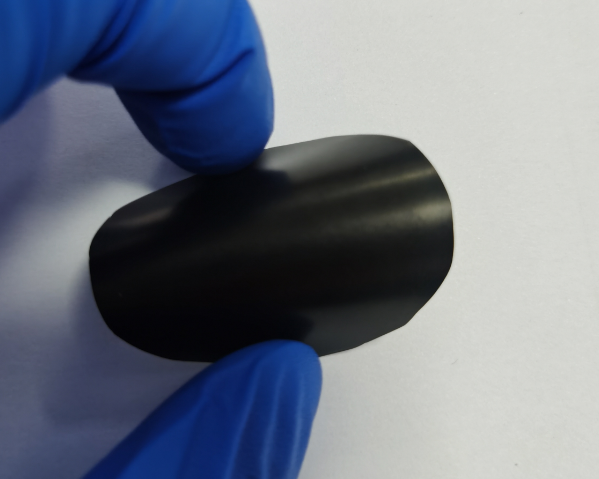


**Fig. S4.** Picture of free-standing Ni/Co-MOF@Ti3C2 hybrid membrane

**Fig. S5.** SEM image of Ti3C2 nanosheet

**Fig. S6.** XRD patterns of Ti3C2 and Ni/Co-MOF@Ti3C2

**Fig. S7.** N2 adsorption-desorption isotherms of at 77 K of Ni/Co-MOF@Ti3C2

**Fig. S8.** O2 adsorption isotherms at 298 K of Ti3C22 and Ni/Co-MOF@Ti3C2
